# Supplementary material for: Calcification detection on upper extremity arteries: a comparison of ultrasonic and X-ray methods
Source: PeerJ. 2023 Aug 23;11:e15855. doi: 10.7717/peerj.15855 (PMC10460149; doi:10.7717/peerj.15855)
Supplement: Data S1 [file peerj-11-15855-s001.xlsx]

## Sheet: Sheet1
study ID	sex	age	primary renal disease	BMI	smoking	hemodialysis duration(months)	KT/v	AVF duration(months)	hypertention	diabetes	CAD	stroke	Ca (mmol/L)	P (mmol/L)	iPTH（pg/mL）	Serum uric acid (umol/L)	Blood urea nitrogen (mmol/L)	CRP（mg/L）	ultrasound	radial artery1 telecentric	radial artery1 middle	radial artery1 proximal	ulnar artery1 telecentric	ulnar artery1 middle	ulnar artery1 proximal	radial artery2 telecentric	radial artery2 middle	radial artery2 proximal	ulnar artery2 telecentric	ulnar artery2 middle	ulnar artery2 proximal	x-ray	radial artery1 telecentric	radial artery1 middle	radial artery1 proximal	ulnar artery1 telecentric	ulnar artery1 middle	ulnar artery1 proximal	radial artery2 telecentric	radial artery2 middle	radial artery2 proximal	ulnar artery2 telecentric	ulnar artery2 middle	ulnar artery2 proximal
23959	female	49	Diabetic nephropathy	23.721	0	58	1.22	58	1	1	0	0	2.29	1.97	321.2	421	29.89	2.78		2	1	1	2	1	1	1	1	0	2	2	0		0	0	0	1	1	0	0	0	0	2	2	0
43605	male	50	Diabetic nephropathy	18.9909	1	38	1.62	38	1	1	1	0	1.61	1.61	688.7	416.3	19.96	1.48		2	2	0	2	2	0	1	0	1	2	2	0		0	0	0	1	1	0	0	0	0	1	0	0
46796	male	35	Glomerulus nephritis	22.3031	1	60	1.62	24	1	0	0	0	1.97	2.53	501.8	401.1	19.51	9.89		2	2	0	2	1	1	1	1	0	1	1	0		1	1	0	2	2	0	0	0	0	0	0	0
62137	male	63	Diabetic nephropathy	25.9109	1	9	1.52	9	1	1	0	0	2.02	1.94	492.4	415.1	28.94	1.04		2	1	0	1	2	0	1	0	0	1	1	0		0	0	0	1	0	0	0	0	0	2	1	0
69873	male	36	Glomerulus nephritis	24.3599	1	81	1.21	80	0	0	0	0	1.78	1.79	89	541.8	32.53	9.58		1	1	0	1	1	1	1	0	0	1	1	0		0	0	0	2	1	0	0	0	0	0	0	0
126914	female	38	Hypertensive nephropathy	25.1851	0	73	1.6	48	1	1	0	0	2.34	1.46	273.9	533.7	23.75	4.82		0	1	1	1	1	0	1	0	0	1	1	0		3	1	0	2	2	0	2	1	0	2	0	1
128448	male	31	Glomerulus nephritis	18.3691	0	134	1.54	35	1	0	0	0	2.26	1.8	198.2	512	25.72	0.5		1	0	1	1	1	0	1	0	0	1	1	0		0	0	0	0	1	0	0	0	0	1	1	0
136317	male	28	Glomerulus nephritis	22.3875	0	20	1.41	20	1	0	0	1	2.57	1.32	60.4	450.4	20.97	0.68		0	1	1	1	1	0	0	1	0	1	1	0		0	0	0	0	0	0	0	0	0	0	0	0
175024	male	42	Glomerulus nephritis	23.7344	1	71	0.93	70	0	1	0	0	1.94	2.01	509.6	588.8	32.68	2.68		1	0	0	1	1	0	0	1	0	1	1	0		2	1	0	1	0	0	0	0	0	0	0	0
178920	male	79	Diabetic nephropathy	26.1892	0	13	1.02	12	1	1	0	1	2.02	1.28	272.2	355.6	26.05	3.47		1	0	0	1	1	0	1	0	0	1	1	0		1	0	0	3	2	0	1	1	0	1	2	0
192160	female	41	Glomerulus nephritis	23.5938	0	29	1.62	29	0	0	0	0	2.23	1.49	550.3	453.5	22	11.31		1	0	0	1	1	0	1	0	0	1	1	0		0	0	0	0	0	0	0	0	0	0	0	0
231524	male	35	Glomerulus nephritis	23.3143	1	8	2.22	6	1	0	0	0	2.08	1.69	348.1	545.8	35.27	0.9		1	0	0	1	1	0	0	0	0	1	1	0		0	0	0	0	0	0	0	0	0	0	0	0
257913	male	47	Diabetic nephropathy	18.5859	0	28	1.61	28	1	1	0	0	2.27	1.51	479.5	507.8	34.77	0.41		0	1	0	1	1	0	0	0	0	1	0	0		0	0	0	2	2	0	0	0	0	0	1	0
259645	male	34	Glomerulus nephritis	20.1384	0	156	1.51	154	1	0	0	0	1.88	1.61	644.8	402.1	29.15	4.29		1	0	0	1	0	0	0	0	0	1	0	0		2	2	0	2	2	0	0	0	0	0	0	0
292727	female	55	Glomerulus nephritis	22.8972	0	60	2.03	60	0	0	0	0	2.17	1.1	147.8	441.4	25.15	1.27		0	0	1	1	0	0	0	0	0	1	0	0		0	0	0	0	0	0	0	0	0	0	0	0
310615	female	55	Glomerulus nephritis	17.9297	0	36	1.4	25	1	0	0	0	2.57	1.48	506.2	424.6	35.41	1.1		1	0	0	0	0	1	0	0	0	1	0	0		0	0	0	0	0	0	0	0	0	0	0	0
329875	female	68	Polycystic kidney disease	22.192	0	45	1.71	45	1	0	0	1	2.16	2.15	839.4	420.3	30.36	1.73		0	0	1	1	0	0	0	0	0	1	0	0		0	0	0	0	0	0	0	0	0	0	0	0
349211	female	63	Diabetic nephropathy	19.5481	0	25	1.7	24	0	1	0	0	2.37	1.38	285.7	380.7	26.53	0.66		0	1	0	1	0	0	0	0	0	1	0	0		1	2	1	0	2	1	1	1	0	3	1	2
353754	male	65	Glomerulus nephritis	18.5491	1	256	1.63	15	1	0	0	0	1.81	1.71	377.6	380.1	26.48	4.02		1	0	0	1	0	0	0	0	0	1	0	0		0	0	0	0	0	0	0	0	0	0	0	0
369174	male	74	Diabetic nephropathy	24.0436	0	13	3.51	11	1	1	0	0	1.84	1.14	530.3	399.4	39.39	0.79		0	0	1	1	0	0	0	0	0	1	0	0		0	0	0	0	0	0	0	0	0	0	0	0
427130	female	60	Diabetic nephropathy	30.2836	0	22	1.4	9	1	1	0	0	2.04	2.53	618.7	440.9	32.44	4.31		0	0	0	1	0	0	0	0	0	0	0	0		0	0	0	0	0	0	0	0	0	0	0	0
498076	male	37	Glomerulus nephritis	29.827	0	18	1.23	18	1	1	0	0	1.97	1.14	505.1	459.7	20.84	5.98		0	0	0	1	0	0	0	0	0	0	0	0		0	0	0	0	0	0	0	0	0	0	0	0
516788	male	85	Diabetic nephropathy	22.9568	0	103	1.42	100	1	1	0	0	2.29	0.91	210.9	376.1	12.57	2.34		0	0	0	1	0	0	0	0	0	0	0	0		0	0	0	0	0	0	0	0	0	0	0	0
621555	male	33	Glomerulus nephritis	27.102	1	11	1.03	11	1	0	0	0	1.74	2.14	358.9	352.2	22.08	1.18		0	0	0	1	0	0	0	0	0	0	0	0		0	0	0	0	0	0	0	0	0	0	0	0
622610	female	52	Diabetic nephropathy	28.1531	0	59	1.42	60	1	1	0	0	2.48	1.78	435	468.5	31.07	8.4		0	0	0	1	0	0	0	0	0	0	0	0		0	1	0	2	2	0	0	0	0	0	0	0
695076	female	81	Polycystic kidney disease	26.9357	0	8	1.62	8	1	0	0	0	1.92	1.21	236.5	356.9	19.46	3.74		0	0	0	0	0	0	0	0	0	0	0	0		0	0	0	0	0	0	0	0	0	0	0	0
717405	male	70	Polycystic kidney disease	20.5113	1	30	2.08	30	1	0	0	0	1.92	2.41	805.7	493.4	37.28	1.01		0	0	0	0	0	0	0	0	0	0	0	0		0	0	0	2	2	0	1	0	0	2	2	0
721577	female	49	Hypertensive nephropathy	20.1951	0	21	1.5	20	1	0	0	1	1.95	2.05	640.1	504.8	31.34	0.6		0	0	0	0	0	0	0	0	0	0	0	0		0	0	0	0	0	0	0	0	0	0	0	0
733650	male	59	Polycystic kidney disease	23.3025	1	51	1.6	50	1	0	0	1	2.31	1.73	653.2	489.3	24.83	4.51		0	0	0	0	0	0	0	0	0	0	0	0		0	0	0	0	0	0	0	0	0	0	0	0
774812	male	43	Glomerulus nephritis	15.8127	1	123	2.03	121	1	0	0	0	2.07	1.29	290.1	520.3	32.13	0.62		0	0	0	0	0	0	0	0	0	0	0	0		0	0	0	2	2	0	0	0	0	0	1	0
815332	male	39	Glomerulus nephritis	33.7024	0	18	1.04	18	1	0	0	0	2.15	1.41	660.9	550.5	34.78	4.05		0	0	0	0	0	0	0	0	0	0	0	0		0	0	0	0	0	0	0	0	0	0	0	0
846797	female	57	Glomerulus nephritis	21.8939	0	72	1.73	32	1	0	0	0	2.26	1.29	778.1	378.1	22.49	1.86		0	0	0	0	0	0	0	0	0	0	0	0		0	0	0	0	1	0	1	0	1	2	2	0
854855	male	72	Glomerulus nephritis	24.6584	1	32	1.22	32	1	1	0	0	1.85	0.91	349.7	392.9	27.78	1.95		0	0	0	0	0	0	0	0	0	0	0	0		0	0	0	0	0	0	0	0	0	0	0	0
877494	female	57	Diabetic nephropathy	17.4818	0	48	1.84	46	1	1	0	1	2.12	1.24	348	332.4	19.02	0.34		0	0	0	0	0	0	0	0	0	0	0	0		1	0	0	1	1	0	0	1	2	1	2	0
899378	male	67	Hypertensive nephropathy	19.534	1	78	1.61	78	1	0	0	0	1.56	1.24	324.1	522.1	29.87	11.71		0	0	0	0	0	0	0	0	0	0	0	0		1	0	0	1	2	0	0	0	0	1	0	2
930578	female	69	Glomerulus nephritis	25.2082	0	120	1.54	120	1	0	1	1	2.23	1.27	307.9	417.1	36.74	1.48		0	0	0	0	0	0	0	0	0	0	0	0		0	0	0	0	0	0	0	0	0	0	0	0
937645	male	62	Glomerulus nephritis	20.4922	0	132	1.4	130	1	0	0	0	2.6	1.92	170.3	614	36.21	2.95		0	0	0	0	0	0	0	0	0	0	0	0		0	1	0	2	2	0	0	0	0	1	0	0
983043	female	56	Glomerulus nephritis	17.9989	0	123	1.77	70	1	0	0	0	2.03	2.34	150.5	469.4	34.28	1.75		0	0	0	0	0	0	0	0	0	0	0	0		0	1	0	1	1	0	3	1	1	2	1	1
985084	male	70	Diabetic nephropathy	26.7949	1	7	1.14	10	1	0	0	1	2.16	1.81	383.3	449.4	31.85	3.07		0	0	0	0	0	0	0	0	0	0	0	0		0	0	0	2	1	0	0	0	0	2	1	0
986211	male	56	Glomerulus nephritis	23.6614	1	94	1.42	94	0	0	0	0	1.96	1.63	378.8	412.4	39.51	1.27		0	0	0	0	0	0	0	0	0	0	0	0		0	0	0	1	0	0	0	0	0	0	0	0
