# Supplementary material for: Calcification detection on upper extremity arteries: a comparison of ultrasonic and X-ray methods
Source: PeerJ journal article supplement (doi:10.7717/peerj.15855), 2023-08-23

# Imaging data

## Case 1

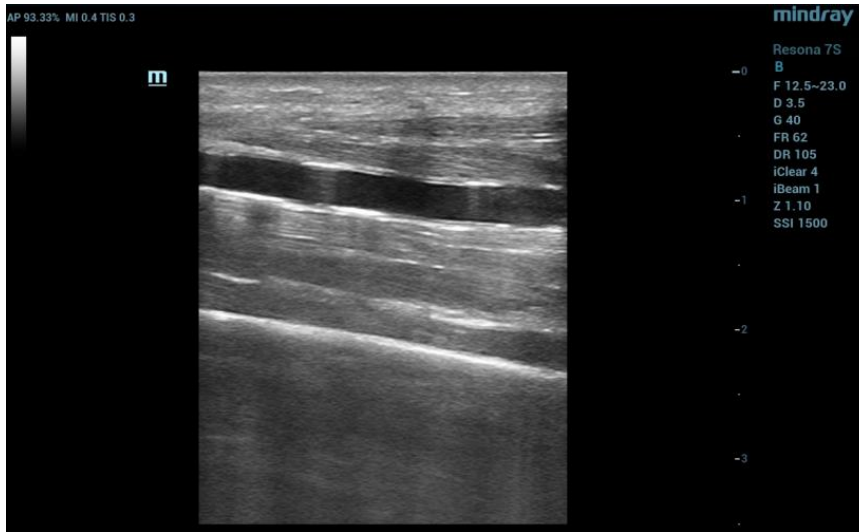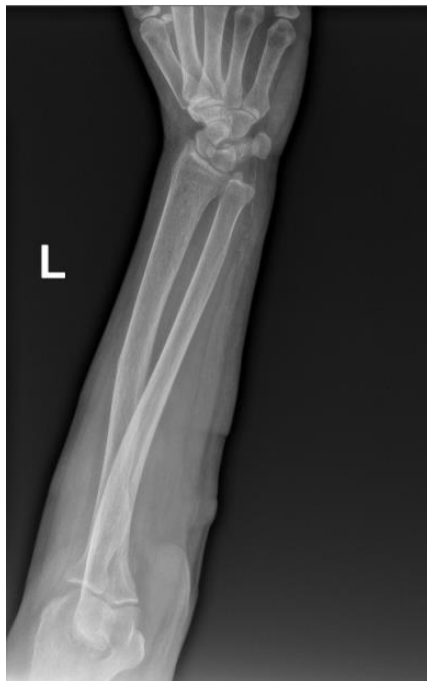

# Case 2

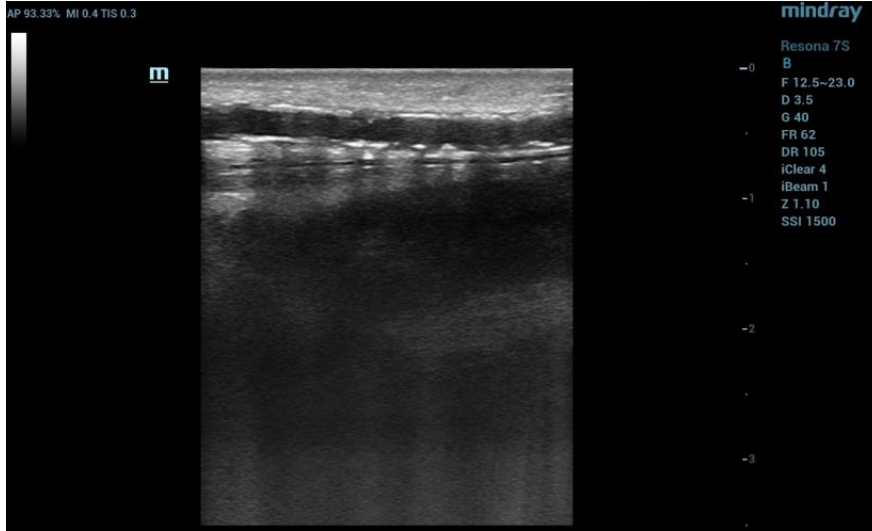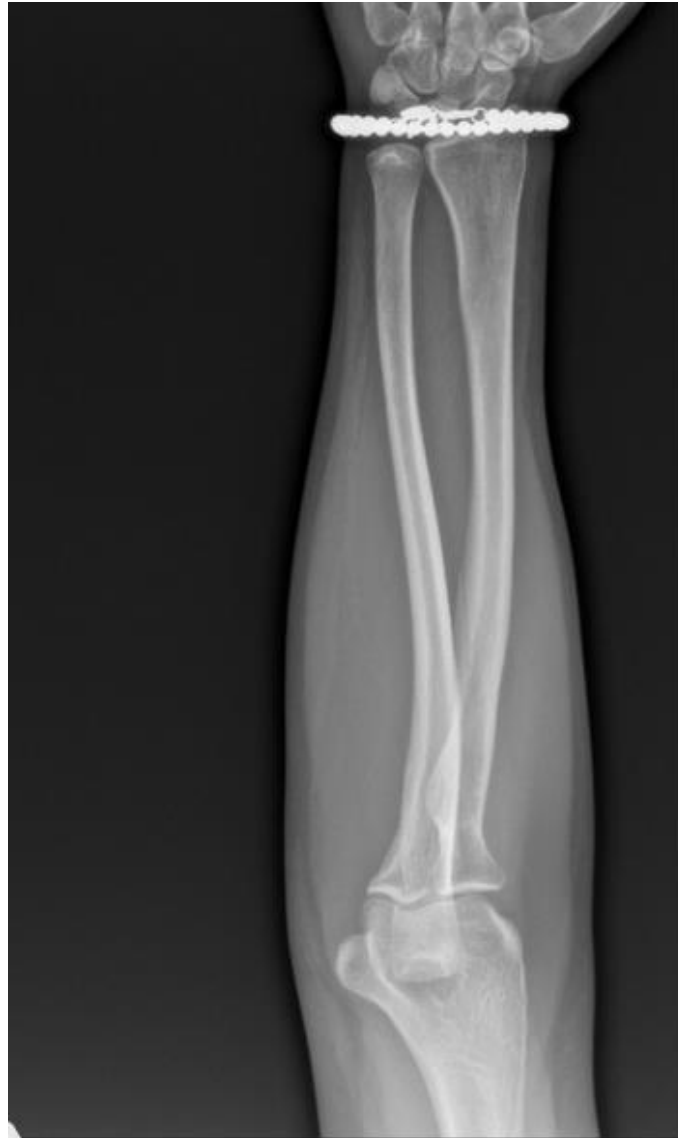

# Case 3

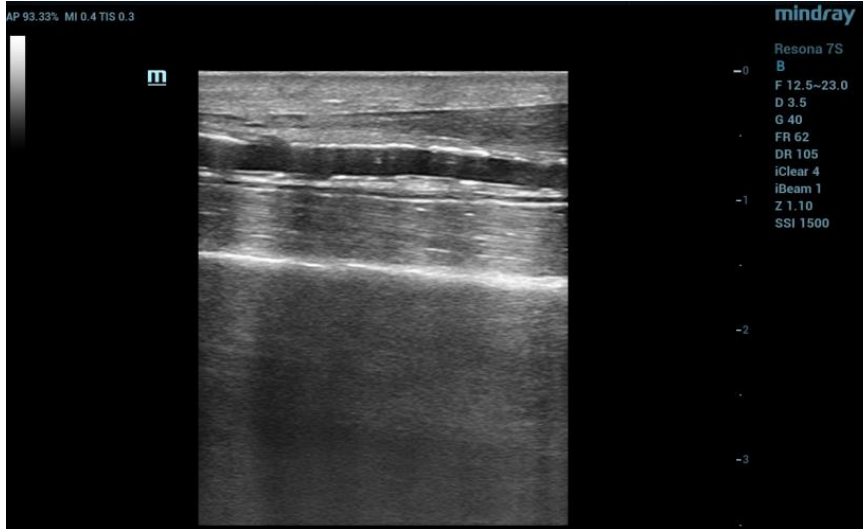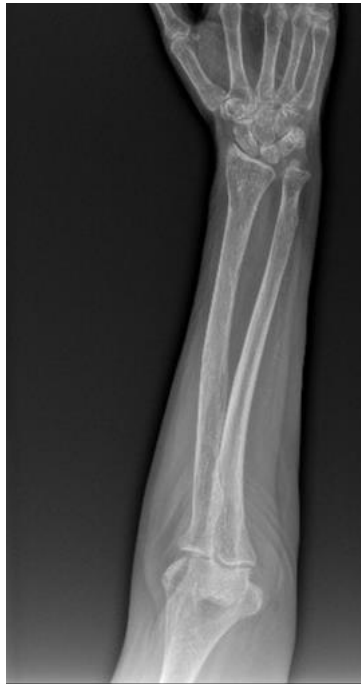

# Case 4

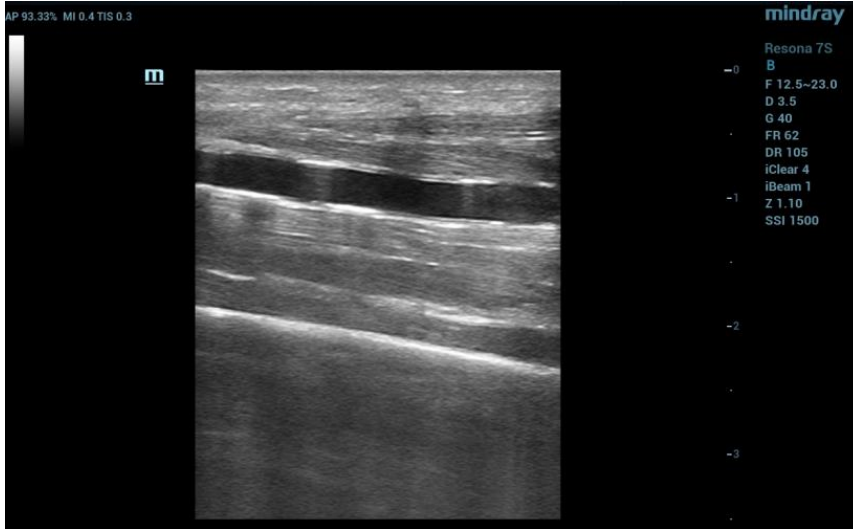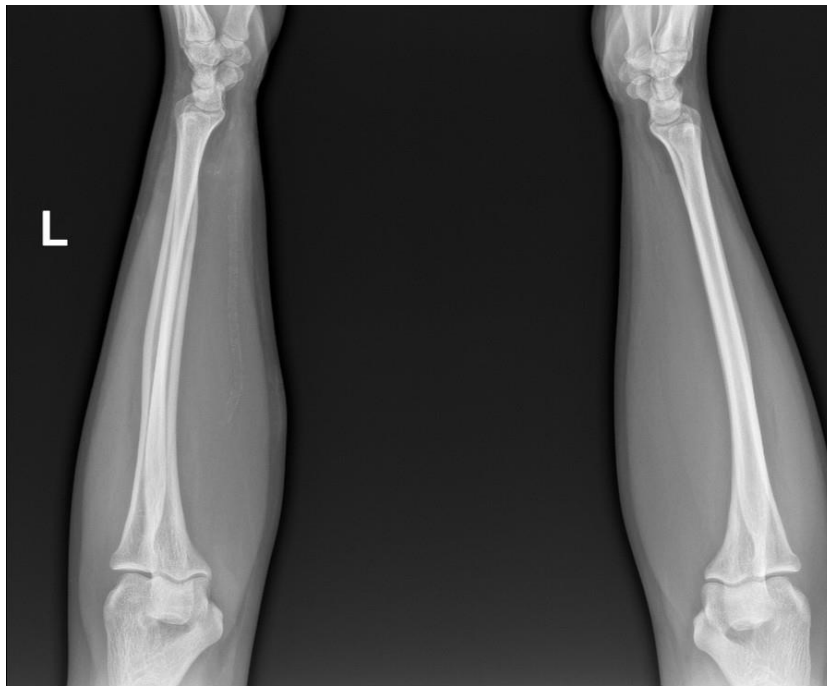

Supplement: Imaging_data.pdf [file Imaging_data.pdf]
